# Supplementary material for: The Relationship between Cancer Stage, Selected Immunological Parameters, Epstein–Barr Virus Infection, and Total Serum Content of Iron, Zinc, and Copper in Patients with Laryngeal Cancer
Source: MDPI journal article supplement (doi:10.3390/jcm13020511), 2024-01-16
Supplement: s1 [file s1]

**Table S1.** Comparative analysis of tested immune system parameters in patients with laryngeal cancer by EBV activity or absence.

| Parameters                | Study group        |                   |                     |                   | Control group       |                   | ANOVA               |                                 | p- value                                         |                                                  |          |
|---------------------------|--------------------|-------------------|---------------------|-------------------|---------------------|-------------------|---------------------|---------------------------------|--------------------------------------------------|--------------------------------------------------|----------|
|                           | EBV+<br>(n=20)     |                   | EBV-<br>(n=20)      |                   | EBV-                |                   | p- value            | Study group<br>EBV+ vs.<br>EBV- | Study group<br>EBV+ vs.<br>control group<br>EBV- | Study group<br>EBV- vs.<br>control group<br>EBV- |          |
|                           | Mean±SD            | Median<br>(Range) | Mean±SD             | Median<br>(Range) | Mean±SD             | Median<br>(Range) |                     |                                 |                                                  |                                                  |          |
| Lymphocyte subpopulations | NK                 | 15.33±5.45        | 16.57 (4.95-23.84)  | 12.97±5.73        | 11.91 (4.16-24.93)  | 63.61±8.98        | 64.50 (44-80)       | 0.17631 <sup>1</sup>            | 0.19038                                          | 0.07193                                          | 0.62599  |
|                           | T CD3+             | 69.55±7.11        | 70.89 (59.02-81.68) | 70.41±7.74        | 70.44 (57.27-84.20) | 76.10±6.46        | 76.11 (63.34-87.66) | 0.00995 <sup>1</sup><br>*       | 0.71523                                          | 0.00415*                                         | 0.01598* |
|                           | B CD19+            | 13.34±4.18        | 13.46 (7.11-22.15)  | 14.81±4.26        | 14.48 (8.11-22.66)  | 10.26±4.54        | 9.94 (4.35-22.12)   | 0.00529 <sup>1</sup><br>*       | 0.27644                                          | 0.03177*                                         | 0.00229* |
|                           | T CD4+CD3+         | 42.26±5.89        | 41.94 (29.91-57.94) | 44.83±7.34        | 45.40 (33.17-63.96) | 49.29±5.81        | 48.29 (38.97-61.22) | 0.00174 <sup>2</sup><br>*       | 0.20358                                          | 0.00056*                                         | 0.02072* |
|                           | T CD8+CD3+         | 27.28±6.28        | 25.44 (20.06-41.76) | 25.64±6.58        | 25.93 (16.66-38.23) | 26.47±4.44        | 25.62 (20.58-36.71) | 0.6987 <sup>2</sup>             | 0.42461                                          | 0.64022                                          | 0.64265  |
|                           | CD4/CD8 ratio      | 1.63±0.43         | 1.71 (0.72-2.54)    | 1.90±0.75         | 1.69 (0.90-3.84)    | 1.92±0.41         | 1.86 (1.13-2.69)    | 0.1958 <sup>2</sup>             | 0.45695                                          | 0.06992                                          | 0.33692  |
|                           | T CD3+CD69+ blood  | 4.46±2.68         | 3.39 (1.40-10.85)   | 6.54±3.25         | 6.64 (1.72-12.32)   | 3.08±1.16         | 2.61 (1.77-5.74)    | 0.00296 <sup>2</sup><br>*       | 0.06787                                          | 0.04375*                                         | 0.00016* |
|                           | B CD19+CD69+ blood | 5.04±2.40         | 5.17 (1.32-9.12)    | 7.10±3.66         | 6.23 (1.77-15.42)   | 6.82±2.75         | 6.76 (2.17-15.40)   | 0.04961 <sup>2</sup><br>*       | 0.04323*                                         | 0.04987*                                         | 0.88172  |
|                           | T CD3+CD25+ blood  | 42.26±11.34       | 45.44 (12.97-56.16) | 47.85±16.11       | 45.39 (26.15-89.93) | 31.85±7.25        | 30.02 (23.46-51.12) | 0.00041 <sup>2</sup><br>*       | 0.21346                                          | 0.00112*                                         | 0.00051* |

|                             |             |                             |             |                             |             |                            |                           |          |          |          |
|-----------------------------|-------------|-----------------------------|-------------|-----------------------------|-------------|----------------------------|---------------------------|----------|----------|----------|
| B                           |             | 30.31                       |             |                             |             | 25.28                      |                           |          |          |          |
| CD19+CD25+<br>blood         | 30.39±9.38  | (18.09-<br>48.73)           | 32.01±13.88 | 27.49 (10-<br>74.64)        | 28.64±10.91 | (11.86-<br>45.48)          | 0.7634 <sup>2</sup>       | 0.73526  | 0.67500  | 0.49034  |
| CD4+CD69+<br>blood          | 5.27±2.99   | 4.44 (2.00-<br>13.84)       | 5.41±2.86   | 4.84 (1.23-<br>10.11)       | 3.08±1.90   | 2.14 (1.17-<br>7.58)       | 0.00392 <sup>2</sup><br>* | 0.87964  | 0.00333* | 0.00579* |
| CD8+CD69+<br>blood          | 4.71±2.38   | 4.35 (1.06-<br>8.85)        | 4.28±2.45   | 3.66 (1.09-<br>10.99)       | 1.29±1.00   | 1.10 (0.29-<br>4.19)       | 0.00001 <sup>2</sup><br>* | 0.57918  | 0.00000* | 0.00002* |
| CD4+CD25+<br>blood          | 53.48±14.22 | 49.49<br>(29.61-<br>76.88)  | 59.17±17.91 | 56.58<br>(31.14-<br>96.69)  | 46.82±8.60  | 45.10<br>(29.98-<br>67.74) | 0.03072 <sup>2</sup><br>* | 0.27337  | 0.07643  | 0.01436* |
| CD8+CD25+<br>blood          | 9.50±9.28   | 7.25 (1.45-<br>41.06)       | 8.04±7.97   | 5.88 (1.76-<br>35.94)       | 2.02±1.03   | 1.76 (0.55-<br>4.59)       | 0.00003 <sup>2</sup><br>* | 0.57920  | 0.00000* | 0.00001* |
| B CD19+PD-1                 | 4.11±1.70   | 3.78 (1.89-<br>7.18)        | 4.48±2.15   | 4.20 (1.14-<br>10.87)       | 6.58±3.08   | 7.11 (1.73-<br>11.34)      | 0.02350 <sup>2</sup><br>* | 0.66512  | 0.00979* | 0.04112* |
| CD4+PD-1<br>blood           | 23.26±4.47  | 22.13<br>(15.67-<br>32.16)  | 19.53±5.60  | 17.93<br>(12.21-<br>30.27)  | 7.74±1.66   | 7.80 (5.09-<br>10.24)      | 0.00000 <sup>1</sup><br>* | 0.02530* | 0.00000* | 0.00000* |
| CD8+PD-1<br>blood           | 19.54±7.36  | 17.45<br>(10.12-<br>32.45)  | 16.77±3.65  | 16.50<br>(11.45-<br>25.26)  | 4.22±2.07   | 4.02 (1.32-<br>8.36)       | 0.00000 <sup>2</sup><br>* | 0.42482  | 0.00000* | 0.00000* |
| IgG VCA EBV<br>quantitative | 83.04±35.91 | 77.04<br>(31.56-<br>148.30) | 99.99±63.81 | 77.77<br>(26.22-<br>242.62) | 58.71±21.44 | 60.33<br>(20.58-<br>89.74) | 0.04617 <sup>2</sup><br>* | 0.30895  | 0.03851* | 0.05652  |

\* statistically significant results, p <0.05; Statistically significant differences were analyzed with the use of <sup>1</sup>ANOVA test, <sup>2</sup>ANOVA Kruskal–Wallis test with post hoc tests to confirm where the differences occurred.
